# Supplementary material
Source: PubMed Central journal article supplement (PMC3457273)
Supplement: JVI.01414-12_zjv999096603so1.pdf [file JVI.01414-12_zjv999096603so1.pdf]

**Figure S1**

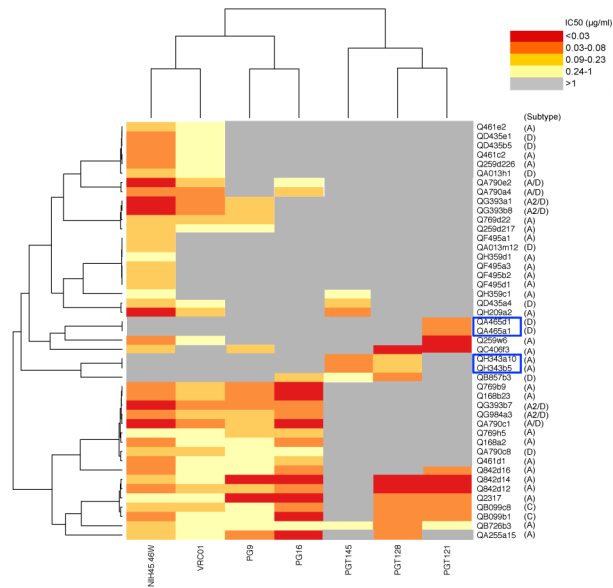

**Figure S1.** Hierarchical clustering of mAbs (bottom) and panel viruses (right). A heatmap of IC<sub>50</sub> values for each virus-mAb combination is shown, with darker shading indicating increasing potency, as indicated by the key. The grey color indicates that 50% neutralization was not achieved at the highest concentration of mAb tested (1  $\mu$ g/ml). Blue boxes indicate viruses that are only neutralized by PGT121, PGT128, and/or PGT145.

Figure S2

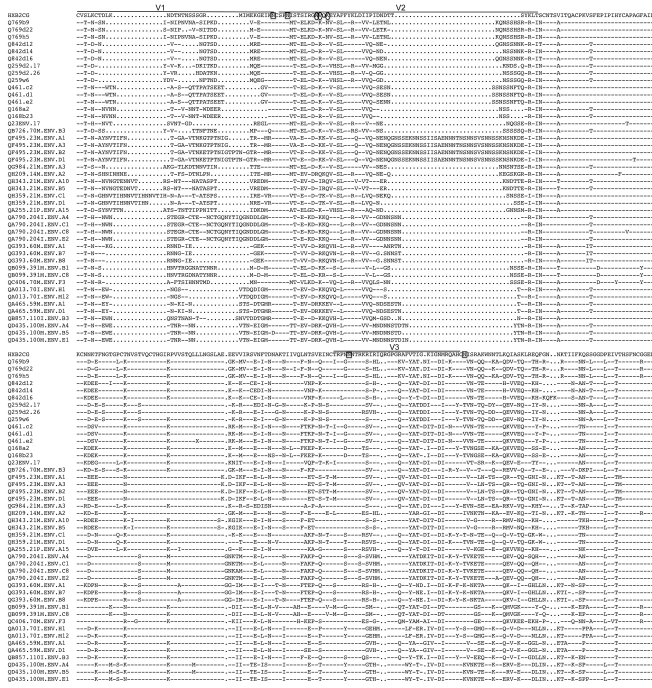

**Figure S2.** Amino acid alignment of the V1-V3 envelope region of all panel viruses. HXB2 sequence is shown at the top as reference. Symbols: dashes, consensus amino acid sequences; dots, deletions; boxes, PNGS at residues 156 and 160 in V1/V2, and at residues 301 and 332 in V3 important for PG9/16 and PGT121/128 neutralization, respectively; circles, positively charged residues in positions 168, 169, and 171 of V2 important for PG9/16 and PGT145 neutralization.

**Figure S3**

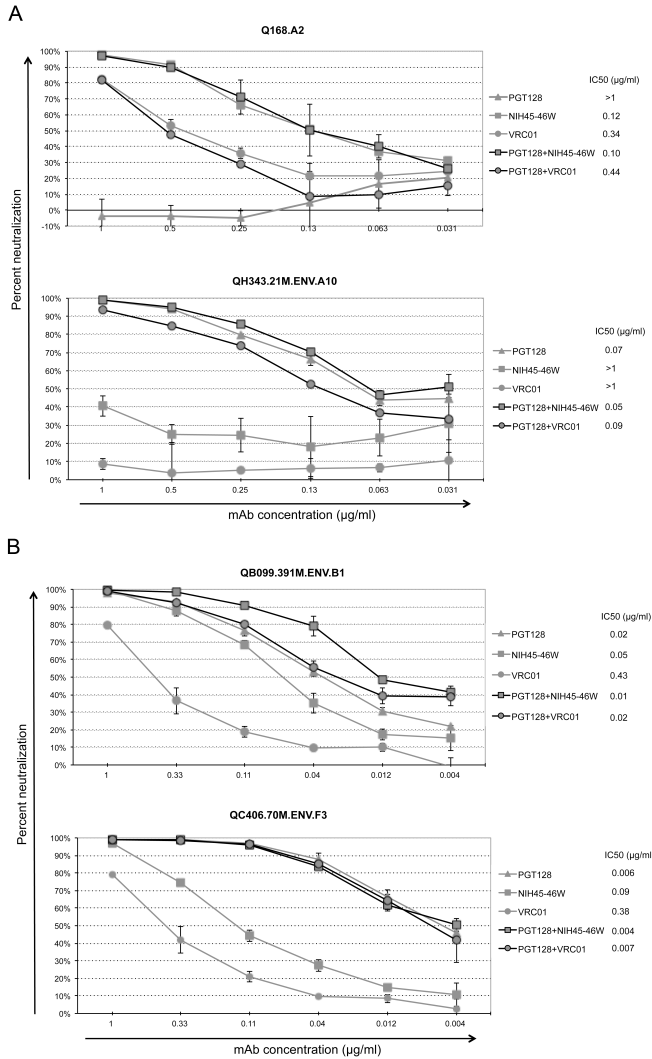

**Figure S3.** Viruses were tested against PGT128 alone, NIH45-46W alone, VRC01 alone, or a 1:1 combination of PGT128, NIH45-46W, and VRC01 at a starting concentration of 1  $\mu\text{g/ml}$  each mAb. Percent neutralization against mAb concentration is plotted. IC50 values are shown in the key and are based on averages from 2 independent experiments, only one of which is shown. (A) Neutralization curves of viruses sensitive to NIH45-46W and VRC01, but not PGT128 (top panel), or vice versa (bottom panel). (B) Neutralization curves of viruses sensitive to NIH45-46W, VRC01, and PGT128.

## Figure S4

| Subject ID | Subtype | Year of infection | Days PI* | Virus                                 | NIH45-46W + PGT128 | PGT 121 | PGT121 + PGT128 | PGT121 + PGT128 + NIH45-46W |
|------------|---------|-------------------|----------|---------------------------------------|--------------------|---------|-----------------|-----------------------------|
| QA465      | D       | 1993              | 59       | QA465.59M.ENV1.A1<br>QA465.59M.ENV.D1 | >1                 | 0.03    | 0.04            | 0.02                        |

  

**Figure S4.** Viruses not neutralized in by a combination of NIH45-46W and PGT128 were tested against PGT121 alone and in combination with either PGT128 or PGT128 and NIH45-46W. Asterisk, estimated days post infection at which envelope clone was obtained. Darker shading indicates increasing mAb potency, as indicated by the key. Grey color indicates that 50% neutralization was not achieved at the highest concentration of mAb tested (1µg/ml). IC50 values shown are averages from at least 2 independent experiments performed in duplicate.
